# Supplementary material for: Mass Production of Early-Stage Bone-Marrow-Derived Mesenchymal Stem Cells of Rat Using Gelatin-Coated Matrix
Source: Hindawi journal article supplement (doi:10.1155/2013/347618), 2013-01-01

**(A)**

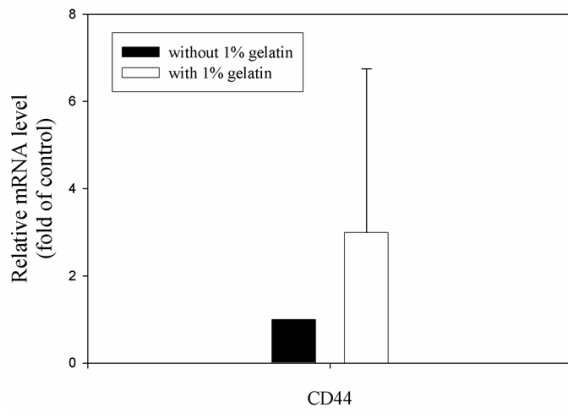

**(B)**

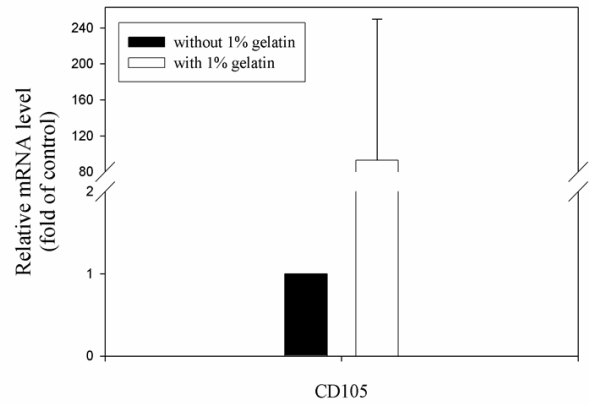

Supplement: f1 [file 347618.f1.pdf]
