# Supplementary material for: Mass Production of Early-Stage Bone-Marrow-Derived Mesenchymal Stem Cells of Rat Using Gelatin-Coated Matrix
Source: Hindawi journal article supplement (doi:10.1155/2013/347618), 2013-01-01
Supplement: f2 [file 347618.f2.pdf]

**Supplementary Table 1. Primary antibodies.**

| <b>Antibody Name</b>             | <b>Clone</b>   | <b>Catalog Number</b> | <b>Company</b> | <b>Dilution Rate</b> |
|----------------------------------|----------------|-----------------------|----------------|----------------------|
| APC anti-mous/rat CD29           | HM $\beta$ 1-1 | 102215                | Biologend      | 1:250                |
| FITC anti-mouse CD31             | TLD-3A12       | Ab33858               | Abcam          | 1:250                |
| FITC anti-rat CD45               | OX-1           | 202205                | Biologend      | 1:250                |
| APC anti-rat CD90                | OX-7           | 202526                | Biologend      | 1:500                |
| Alexa Fluor® 647 anti-rat Nestin | 25/NESTIN      | 560393                | BD bioscience  | 1:20                 |
