# Supplementary material for: Mass Production of Early-Stage Bone-Marrow-Derived Mesenchymal Stem Cells of Rat Using Gelatin-Coated Matrix
Source: Hindawi journal article supplement (doi:10.1155/2013/347618), 2013-01-01
Supplement: f3 [file 347618.f3.pdf]

**Supplementary Table 2. Oligonucleotide primers and PCR cycling conditions.**

| <b>Genes</b> | <b>Accession number</b> | <b>Primer sequence</b>  |                              | <b>Size (bp)</b> | <b>Temperature (°C)</b> |
|--------------|-------------------------|-------------------------|------------------------------|------------------|-------------------------|
|              |                         | <b>Sense (5'&gt;3')</b> | <b>Anti-sense (5'&gt;3')</b> |                  |                         |
| <i>CD45</i>  | NM_012924.2             | CAGCCAGTGACAGGTTCCAT    | CTGTGCCAGGCTCAACTGTA         | 159              | 60                      |
| <i>CD105</i> | NM_001010968            | GAATGGCAACCACGAACCCA    | CCAGGAGACGTACGGGGGAC         | 195              | 60                      |
| <i>GAPDH</i> | NM_017008.4             | GGACCTCATGGCCTACATGG    | CCCCTCCTGTTGTTATGGGG         | 179              | 60                      |
